# Supplementary material
Source: PubMed Central journal article supplement (PMC3127667)
Supplement: supp_10_6_753__1.pdf [file supp_10_6_753__1.pdf]

## Supplemental Material

**Table S1. Strains used in this study**

| Strain                          | Parent                     | <i>MTL</i> | Relevant genotype                                                                              | Reference or source |
|---------------------------------|----------------------------|------------|------------------------------------------------------------------------------------------------|---------------------|
| P37005                          | –                          | <b>a/a</b> | Wild type                                                                                      | [S1]                |
| WO-1                            | –                          | <b>α/α</b> | Wild type                                                                                      | [S2]                |
| <i>ste2/ste2</i>                | P37005                     | <b>a/a</b> | <i>ste2::FRT/ste2::FRT</i>                                                                     | [S3]                |
| <i>ste2/ste2-STE2</i>           | <i>ste2/ste2</i>           | <b>a/a</b> | <i>ste2::FRT/ste2::FRT-STE2::SAT<sup>R</sup></i>                                               | This study          |
| <i>mfa/mfa</i>                  | P37005                     | <b>a/a</b> | <i>mfa1::FRT/mfa1::FRT</i>                                                                     | This study          |
| <i>mfa/mfa-MFa</i>              | <i>mfa1/mfa1</i>           | <b>a/a</b> | <i>mfa1::FRT/mfa1::FRT-MFa1::SAT<sup>R</sup></i>                                               | This study          |
| <i>ste3/ste3</i>                | P37005                     | <b>a/a</b> | <i>ste3::FRT/ste3::FRT</i>                                                                     | This study          |
| <i>mfa/mfa</i>                  | P37005                     | <b>a/a</b> | <i>mfa1::FRT/mfa1::FRT</i>                                                                     | This study          |
| <i>wor1/wor1</i>                | P37005                     | <b>a/a</b> | <i>wor1::FRT/wor1::FRT</i>                                                                     | This study          |
| <i>wor1/wor1-WOR1</i>           | <i>wor1/wor1</i>           | <b>a/a</b> | <i>wor1::FRT/wor1::FRT-WOR1::SAT<sup>R</sup></i>                                               | This study          |
| <i>wor1/wor1-TETp-WOR1</i>      | <i>wor1/wor1</i>           | <b>a/a</b> | <i>wor1::FRT/wor1::FRT-WOR1::SAT<sup>R</sup><br/>ADH1/adh1::ptet-WOR1-GFP::SAT<sup>R</sup></i> | This study          |
| <i>ste3/ste3</i> (WO-1)         | WO-1                       | <b>α/α</b> | <i>ste3::FRT/ste3::FRT</i>                                                                     | This study          |
| <i>ste3/ste3-STE3</i>           | <i>ste3/ste3</i><br>(WO-1) | <b>α/α</b> | <i>ste3::FRT/ste3::FRT-STE3::SAT<sup>R</sup></i>                                               | This study          |
| <i>mfa/mfa</i> (WO-1)           | WO-1                       | <b>α/α</b> | <i>mfa1::FRT/mfa1::FRT</i>                                                                     | This study          |
| <i>mfa/mfa-MFa</i>              | <i>mfa1/mfa1</i><br>(WO-1) | <b>α/α</b> | <i>mfa1::FRT/mfa1::FRT-MFa1::SAT<sup>R</sup></i>                                               | This study          |
| <i>wor1/wor1</i> (WO-1)         | WO-1                       | <b>α/α</b> | <i>wor1::FRT/wor1::FRT</i>                                                                     | This study          |
| <i>wor1/wor1-WOR1</i><br>(WO-1) | <i>wor1/wor1</i><br>(WO-1) | <b>α/α</b> | <i>wor1::FRT/wor1::FRT-WOR1::SAT<sup>R</sup></i>                                               | This study          |
