# Supplementary material
Source: PubMed Central journal article supplement (PMC3127667)
Supplement: supp_10_6_753__2.pdf [file supp_10_6_753__2.pdf]

1 **Supplemental Material**

2

3 **Supplemental References**

- 4 S1. Lockhart SR, Pujol C, Daniels KJ, Miller MG, Johnson AD, et al. (2002) In *Candida*  
5 *albicans*, white-opaque switchers are homozygous for mating type. *Genetics* 162: 737-  
6 745.
- 7 S2. Slutsky B, Staebell M, Anderson J, Risen L, Pfaller M, et al. (1987) "White-opaque  
8 transition": a second high-frequency switching system in *Candida albicans*. *J Bacteriol*  
9 169: 189-197.
- 10 S3. Yi S, Sahni N, Daniels KJ, Pujol C, Srikantha T, et al. (2008) The same receptor, G  
11 protein, and mitogen-activated protein kinase pathway activate different downstream  
12 regulators in the alternative white and opaque pheromone responses of *Candida albicans*.  
13 *Mol Biol Cell* 19: 957-970.

14
