# Supplementary material
Source: PubMed Central journal article supplement (PMC3127667)
Supplement: supp_10_6_753__3.pdf [file supp_10_6_753__3.pdf]

1 **Supplemental Material**

2

3 **Table S2. Oligonucleotides Used in This Study**

4

| <b>Primer</b> | <b>Gene/Purpose</b>        | <b>Sequence</b>                                    |
|---------------|----------------------------|----------------------------------------------------|
| MFA1f1        | <i>MFA1</i> heterozygote   | 5'-CAGAAACATACATACATTGA -3'                        |
| MFA1r1        | <i>MFA1</i> heterozygote   | 5'-CAGCACCTGT <u>CCCGGG</u> TCTTTGGTTTGACCAGATC-3' |
| MFA1f2        | <i>MFA1</i> heterozygote   | 5'-ATTCAAATA <u>CCCGGG</u> ACAGGTGCTGTCACTGTTCA-3' |
| MFA1r2        | <i>MFA1</i> heterozygote   | 5'-TGTGATAATTCCTGATCGT -3'                         |
| MFA1f3        | <i>MFA1</i> homozygote     | 5'-CAGAAACATACATACATTGA -3'                        |
| MFA1r3        | <i>MFA1</i> homozygote     | 5'-CAGCACCTGT <u>CCCGGG</u> TCTTTGGTTTGACCAGATC-3' |
| MFA1f4        | <i>MFA1</i> homozygote     | 5'-ATTCAAATA <u>CCCGGG</u> ACAGGTGCTGTCACTGTTCA-3' |
| MFA1r4        | <i>MFA1</i> homozygote     | 5'-TGTGATAATTCCTGATCGT -3'                         |
| MFaf1         | <i>MFa</i> heterozygote    | 5'-AGAAAAGAAAATCGACACTC-3'                         |
| MFar1         | <i>MFa</i> heterozygote    | 5'-TCCATCTTCT <u>CCCGGG</u> TTGATTTAATTAGTTGATG-3' |
| MFaf2         | <i>MFa</i> heterozygote    | 5'-TTAAATCA <u>CCCGGG</u> GAGAAGATGGAAAGCATACT-3'  |
| MFar2         | <i>MFa</i> heterozygote    | 5'-AAATCCTGGCTCATTCTTT-3'                          |
| MFaf3         | <i>MFa</i> homozygote      | 5'-AGAAAAGAAAATCGACACTC-3'                         |
| MFar3         | <i>MFa</i> homozygote      | 5'-TCCATCTTCT <u>CCCGGG</u> TTGATTTAATTAGTTGATG-3' |
| MFaf4         | <i>MFa</i> homozygote      | 5'-TTAAATCA <u>CCCGGG</u> GAGAAGATGGAAAGCATACT-3'  |
| MFar4         | <i>MFa</i> homozygote      | 5'-AAATCCTGGCTCATTCTTT-3'                          |
| MFαQ1f        | <i>MFa</i> complementation | 5'-TTCCTCTTTAGTATCGGTAAGGAA-3'                     |
| MFαQ1r        | <i>MFa</i> complementation | 5'- <u>TCCCGGG</u> TTTCTATCCGTTTACGTCTTCAT-3'      |
| MFαQ2f        | <i>MFa</i> complementation | 5'- <u>TCCCGGG</u> TCTTGATACACAAATGAAGTGAAC-3'     |
| MFαQ2r        | <i>MFa</i> complementation | 5'-ACATTGATGACGATAATGGTTCTT-3'                     |
| STE2f1        | <i>STE2</i> heterozygote   | 5'-TCTATTGTGTAAACTATTAC-3'                         |
| STE2r1        | <i>STE2</i> heterozygote   | 5'-GTGT <u>CCCGGG</u> AATCAATGCCTAGTCGATC-3'       |

|         |                             |                                                   |
|---------|-----------------------------|---------------------------------------------------|
| STE2f2  | <i>STE2</i> heterozygote    | 5'-TGTACCCGGGCAAATCACCATCAAAAGA-3'                |
| STE2r2  | <i>STE2</i> heterozygote    | 5'-CTTGTACTGGTTCAGCAACC-3'                        |
| STE2f3  | <i>STE2</i> homozygote      | 5'-GATCGACTAGGCATTGATTTTTG-3'                     |
| STE2r3  | <i>STE2</i> homozygote      | 5'-TCAT <u>CCCGGGT</u> CCTTCTTATGTTGAACAC-3'      |
| STE2f4  | <i>STE2</i> homozygote      | 5'-TCTT <u>CCCGGGT</u> CAAACTGCTAATAAT-3'         |
| STE2r4  | <i>STE2</i> homozygote      | 5'-CACTCTTTTGATGGTGATTG-3'                        |
| STE2Q1f | <i>STE2</i> complementation | 5'-ATGATCGACTAGGCATTGATT-3'                       |
| STE2Q1r | <i>STE2</i> complementation | 5'-TCC <u>CCCGGGT</u> GTTCCAAGTGCCTCCAACTTTC-3'   |
| STE2Q2f | <i>STE2</i> complementation | 5'-TCC <u>CCCGGG</u> GATAACGCAACTTCTATTTGGAATA-3' |
| STE2Q2r | <i>STE2</i> complementation | 5'-ATAATGAGGTTGAGCATTGGGGAAT-3'                   |
| STE3f1  | <i>STE3</i> heterozygote    | 5'-TGAATCTACTTTGGGCAGAG-3'                        |
| STE3r1  | <i>STE3</i> heterozygote    | 5'-CCA <u>CCCGGG</u> ATTTTCCTCTTGGTTTT-3'         |
| STE3f2  | <i>STE3</i> heterozygote    | 5'-ACA <u>CCCGGGT</u> CCTTCGCCTGCAACATTA-3'       |
| STE3r2  | <i>STE3</i> heterozygote    | 5'-CACAATGCAGATGTTGTCG-3'                         |
| STE3f3  | <i>STE3</i> homozygote      | 5'-AAAACCAAGAGGAAAATCCC-3'                        |
| STE3r3  | <i>STE3</i> homozygote      | 5'-ACTT <u>CCCGGGT</u> GCCATAAAAAATGGCGG-3'       |
| STE3f4  | <i>STE3</i> homozygote      | 5'-ACAG <u>CCCGGG</u> CAACTGTATTCTTTCTGT-3'       |
| STE3r4  | <i>STE3</i> homozygote      | 5'-GCAGGCGAAGACTGGAGTTG-3'                        |
| WOR1f1  | <i>WOR1</i> heterozygote    | 5'-TAA <u>CTCGAG</u> ACAAGAACAAGAAGCC-3'          |
| WOR1r1  | <i>WOR1</i> heterozygote    | 5'-TAA <u>CCCGGG</u> GATACTAATTGTTGTTTTC-3'       |
| WOR1f2  | <i>WOR1</i> heterozygote    | 5'-TAA <u>CCCGGG</u> GAATTAATACGGTGATTC-3'        |
| WOR1r2  | <i>WOR1</i> heterozygote    | 5'-TAA <u>CTCGAG</u> CATAAGGTGAATTCGCAATGAC-3'    |
| WOR1f3  | <i>WOR1</i> homozygote      | 5'-TAA <u>CTCGAG</u> TATTAAGCAATGTCTAATTC-3'      |
| WOR1r3  | <i>WOR1</i> homozygote      | 5'-TAA <u>CCCGGG</u> GTTGGTTCGTACTCGTCGTCG-3'     |
| WOR1f4  | <i>WOR1</i> homozygote      | 5'-TAA <u>CCCGGG</u> GAGTGGCTGGTGTAGGAGC-3'       |
| WOR1r4  | <i>WOR1</i> homozygote      | 5'-TAA <u>CTCGAG</u> CTAAGTACCGGTGTAATAG-3'       |
| WOR1Q1f | <i>WOR1</i> complementation | 5'-CATCTCAAACATCAAAGATACACT-3'                    |
| WOR1Q1r | <i>WOR1</i> complementation | 5'-TCC <u>CCCGGG</u> TATGCATCATAAGGTGAATTCGCA-3'  |

|          |                             |                                            |
|----------|-----------------------------|--------------------------------------------|
| WOR1Q2f  | <i>WOR1</i> complementation | 5'-TCCCCCGGGAAGATAGGTGGATGTATGAATATC-3'    |
| WOR1Q2r  | <i>WOR1</i> complementation | 5'-TTAGCTCTATGAGAATTGATGGTT-3'             |
| TetWor1F | <i>WOR1</i> overexpression  | 5'-TCCGTCGACAAAGATGTCTAATTCAAGTATAGTCCC-3' |
| TetWor1R | <i>WOR1</i> overexpression  | 5'-TCCGTCGACAAAGTACCGGTGTAATACGACC-3'      |

---
