# Supplementary material
Source: PubMed Central journal article supplement (PMC3127667)
Supplement: supp_10_6_753__4.pdf [file supp_10_6_753__4.pdf]

1 **Supplemental Material**

2

**Table S3. Primers used for RT-PCR**

| <b>Primer</b> | <b>Gene</b>  | <b>Sequence</b>             |
|---------------|--------------|-----------------------------|
| CSH1f         | <i>CSH1</i>  | 5'-GAACGGTAAAGGATTGAGTA-3'  |
| CSH1r         |              | 5'-TCAGAGTCGAATGGACGACA-3'  |
| EAP1f         | <i>EAP1</i>  | 5'-ACCGTCACTACCAATGATGT-3'  |
| EAP1r         |              | 5'-TGGATGCAGTACTTTCAGTA-3'  |
| SUN41f        | <i>SUN41</i> | 5'-TGGCAGCTTTTGAAGATCC-3'   |
| SUN41r        |              | 5'-ACCTCCAACAACGGTTGGAAT-3' |
| RBT5f         | <i>RBT5</i>  | 5'-TGTGCCAAAGAATGTGTCAA-3'  |
| RBT5r         |              | 5'-TCTTCAGCTTTAGAAAGTTTC-3' |
| CEK1f         | <i>CEK1</i>  | 5'-AGCCATTCATAAACCATCAC-3'  |
| CEK1r         |              | 5'-CGTATTCTGTCATGAATCCA-3'  |
| RBT1f         | <i>RBT1</i>  | 5'-TTGTCTTCCATCAGGTTTCA-3'  |
| RBT1r         |              | 5'-GAAGATGAAGTGGTAACTGT-3'  |
| ACT1f         | <i>ACT1</i>  | 5'-CCATTCGGTGAGTAATCCTA-3'  |
| ACT1r         |              | 5'-CACATACCAGAACCGTTATC-3'  |
| WOR1f         | <i>WOR1</i>  | 5'-CGATCAGGTCCAATGTTGC-3'   |
| WOR1r         |              | 5'-AGGACGTTGCAATTTCCCTGA-3' |

3
